# Supplementary material for: Manganese(ii) oxide-embedded dopamine-derived carbon nanospheres for durable zinc-ion batteries
Source: Royal Society of Chemistry journal article supplement (doi:10.1039/d4qm00505h), 2024-01-01
Supplement: d4qm00505h1.pdf [file d4qm00505h1.pdf]

## **Manganese (II) oxide-embedded dopamine-derived carbon nanospheres for durable zinc-ion batteries**

Zixiang Zhou, Jianbo Tong\*, Jiale Guo, Shuhan Liu, Shaofeng Guo, Zhipeng Qin,  
Zelei Chang, Chao Wang, Shuling Liu\*

*Department of Chemistry and Chemical Engineering, Shaanxi Collaborative  
Innovation Center of Industrial Auxiliary Chemistry & Technology, Key Laboratory of  
Auxiliary Chemistry and Technology for Chemical Industry, Ministry of Education,  
Shaanxi University of Science and Technology, Xi'an, Shaanxi 710021, China*

\*Corresponding author.

E-mail address: liushuling@sust.edu.cn

jianbotong@aliyun.com

### *Chemicals*

The following reagents were used without further purifications. Manganese(III) acetate dihydrate ( $\text{Mn}(\text{CH}_3\text{COO})_3 \cdot 2\text{H}_2\text{O}$ , AR, 97.0%), dopamine hydrochloride ( $\text{C}_8\text{H}_{11}\text{NO}_2 \cdot \text{HCl}$ , AR, 99%), tris(hydroxymethyl)aminomethane ( $\text{C}_4\text{H}_{11}\text{NO}_3$ , AR, 99%), manganese sulfate tetrahydrate ( $\text{MnSO}_4 \cdot 4\text{H}_2\text{O}$ , AR, 98.0%), zinc sulfate heptahydrate ( $\text{ZnSO}_4 \cdot 7\text{H}_2\text{O}$ , AR, 98.0%), and doubly distilled water.

### *Material characterizations*

Crystallographic phases of the samples are assessed using X-ray diffraction (XRD) employing a Bruker D8 Advance instrument in Bragg-Brentano geometry with a Cu target ( $\lambda = 0.154 \text{ nm}$ ). Thermogravimetric analysis (TGA) is conducted to analyze the degradation pattern of precursor samples (post-drying) from room temperature to 600 °C at a heating rate of 5 °C  $\text{min}^{-1}$  under  $\text{N}_2$  flow, utilizing a thermogravimetric analyzer (STA7200RV, Hitachi). X-ray photoelectron spectroscopy (XPS) measurements are performed using an AXIS SUPRA instrument (Renishaw-invia). Field emission scanning electron microscopy (FE-SEM) at an accelerating voltage of 10 kV is employed to observe sample morphologies. Raman spectroscopy measurements are conducted using a Renishaw Invia Raman spectroscope. Transmission electron microscopy (TEM) equipped with energy-dispersive X-ray spectroscopy (EDS) (Xplore-30, Oxford), High-resolution transmission electron microscopy (HR-TEM), and selected area electron diffraction (SAED) patterns are obtained utilizing the FEI Tecnai G2 F20 instrument with an acceleration voltage of 200 kV.

### *Electrochemical characterizations*

The cathode of the ZIBs is fabricated using active material, acetylene black as the conductive agent, and polyvinylidene fluoride as the binder (with a weight ratio of 7:2:1), and N-methyl-2-pyrrolidone is utilized as the solvent during the process of ink slurry preparation. After continuous stirring, the resulting slurry is coated onto a stainless steel circular mesh with a diameter of 12 mm, followed by drying in a vacuum oven at 80 °C for 12 h. The active material loading was approximately 2 mg cm<sup>-2</sup>. The electrochemical analysis of all samples is performed using a CR2032 coin cell with zinc foil as the negative electrode, glass fiber as the separator, and 2 M ZnSO<sub>4</sub>, 2 M ZnSO<sub>4</sub> + 0.2 M MnSO<sub>4</sub> or 2 M ZnSO<sub>4</sub> + 0.5 M MnSO<sub>4</sub> aqueous solution as the electrolyte. Cyclic voltammetry (CV) and electrochemical impedance spectroscopy (EIS) are conducted using CHI660E or PARSTAT MC potentiostats. Unless specified otherwise, all potentials are referenced to Zn/Zn<sup>2+</sup>. The CV scans are performed within the range of 1-1.85 V at a scan rate of 0.1 mV s<sup>-1</sup>, while EIS measurements are carried out across a frequency spectrum from 10<sup>5</sup> to 0.01 Hz, with an alternating potential amplitude of 5 mV. A battery test system (LAND MTI-5 V 10 mA) is utilized to assess the cycling and charge–discharge characteristics of the coin cells.

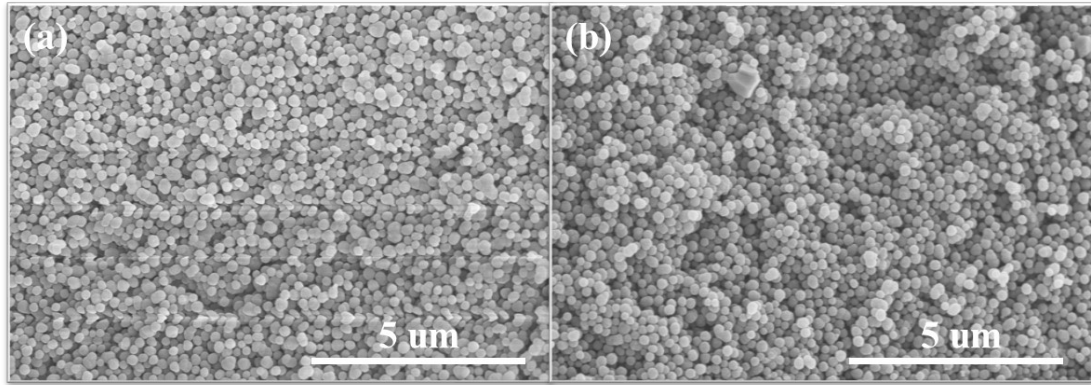

**Fig. S1.** SEM images of the (a) Mn-PDA and (b) MnO-C/PDA.

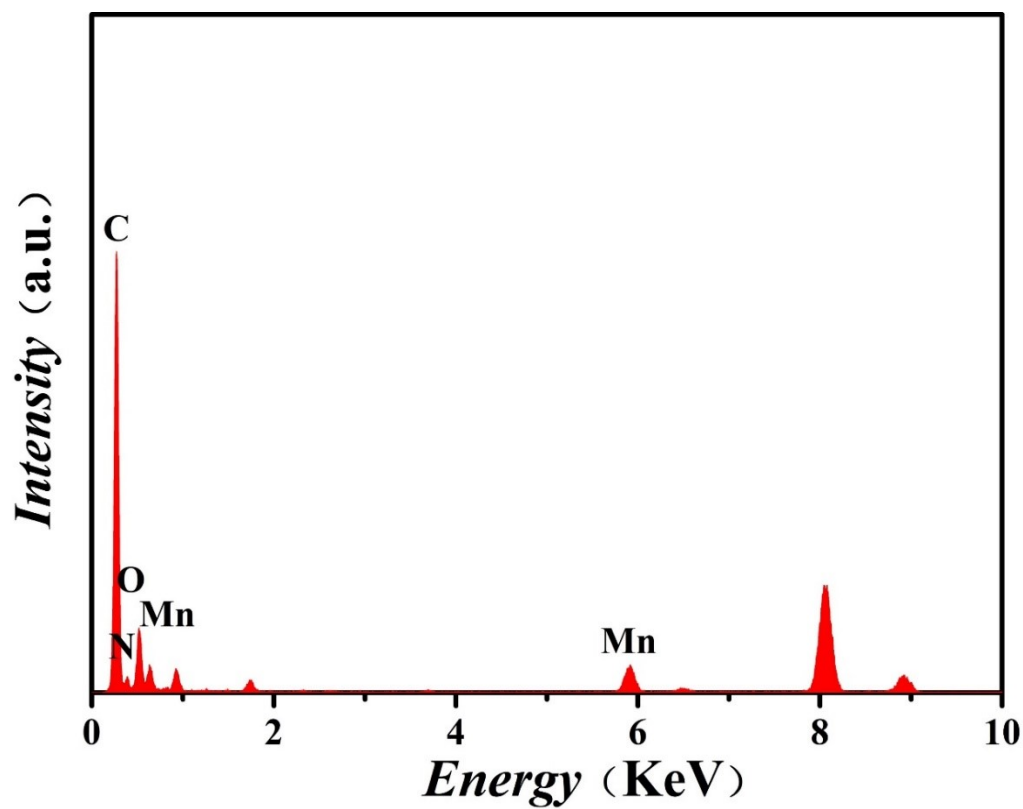

Fig. S2. EDS spectrum of the MnO-C/PDA.

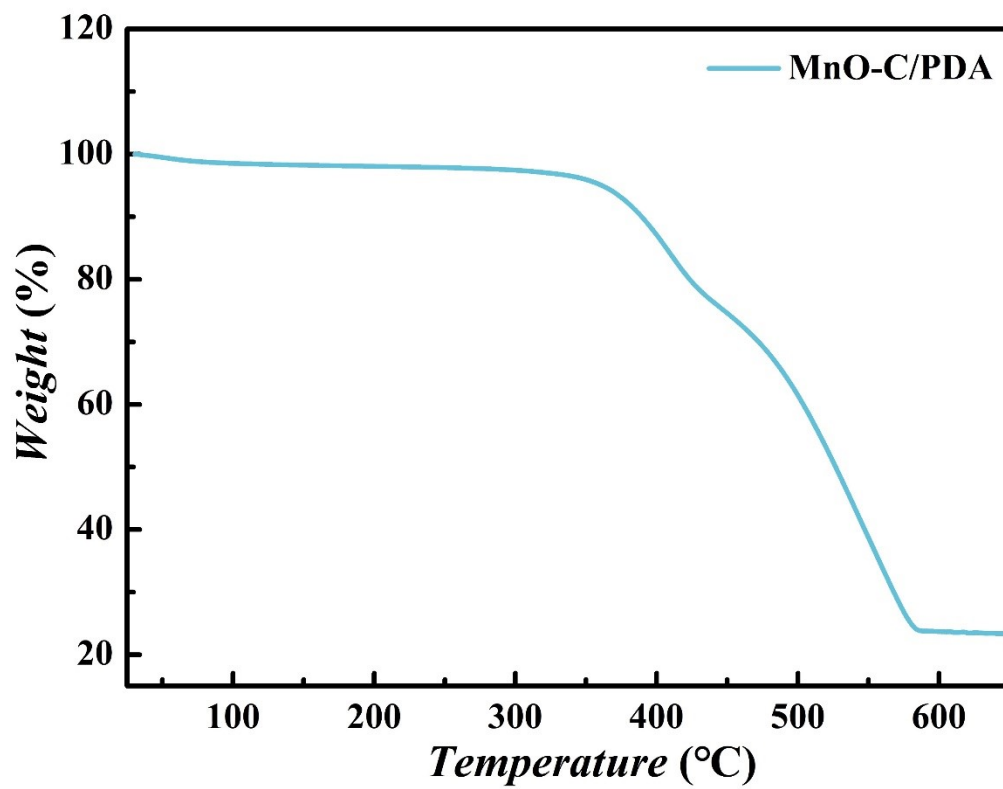

Fig. S3. TGA curve of the MnO-C/PDA.

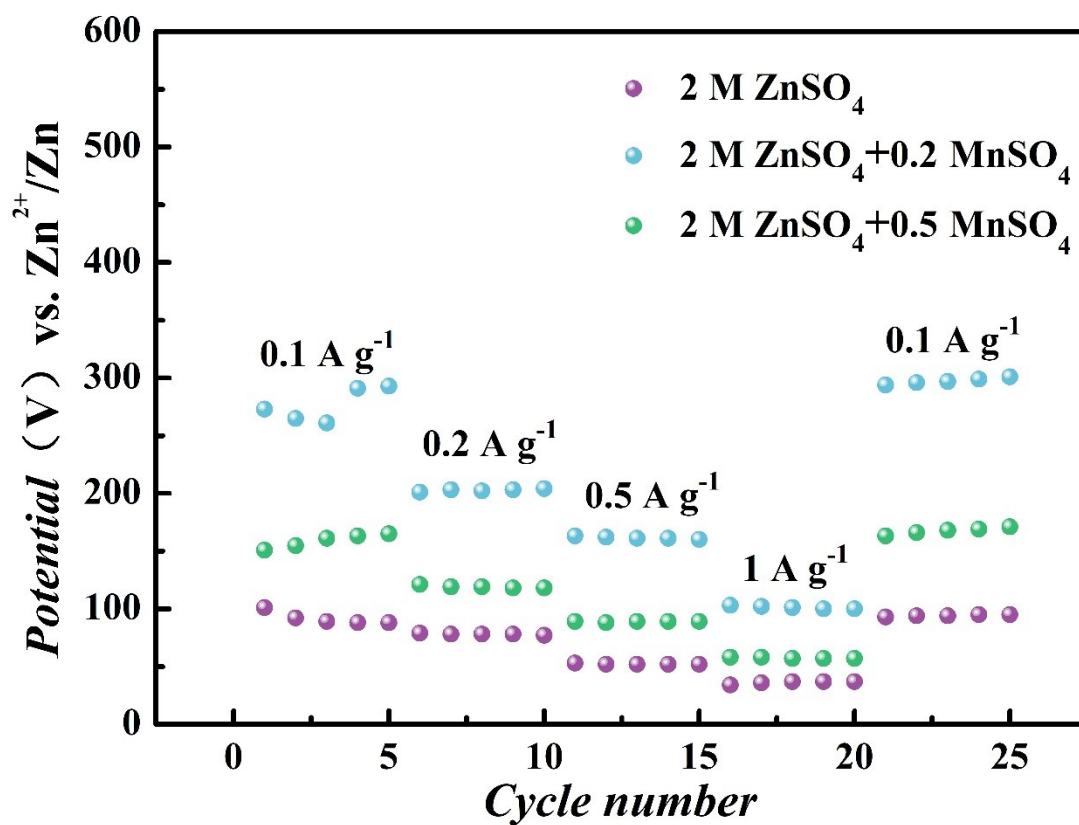

**Fig. S4.** Rate performances of the MnO-C/PDA in 2 M ZnSO<sub>4</sub>, 2 M ZnSO<sub>4</sub> + 0.2 M MnSO<sub>4</sub> and 2 M ZnSO<sub>4</sub> + 0.5 M MnSO<sub>4</sub> electrolytes.

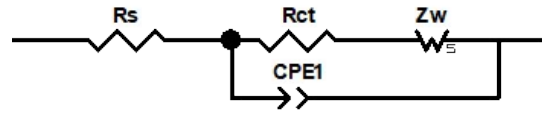

**Fig. S5.** The fitted equivalent circuit of EIS.



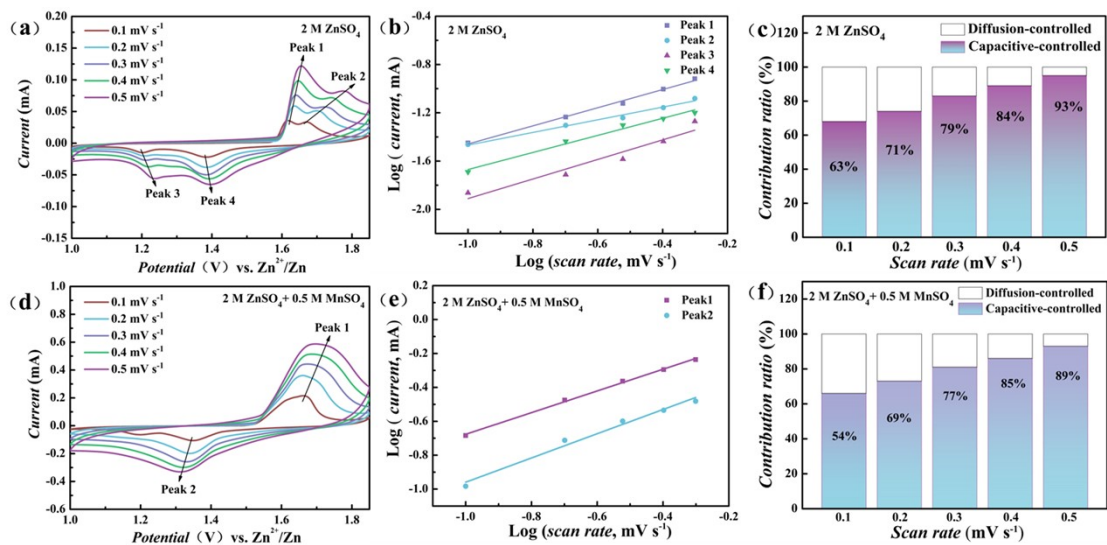

**Fig. S6.** CV curves of MnO-C/PDA ranging from 0.1 to 0.9 mV s<sup>-1</sup> in (a) 2 M ZnSO<sub>4</sub> and (d) 2 M ZnSO<sub>4</sub> + 0.5 M MnSO<sub>4</sub> electrolytes; Log (peak current) versus log (scan rate) plot of MnO-C/PDA in (b) 2 M ZnSO<sub>4</sub> and (e) 2 M ZnSO<sub>4</sub> + 0.5 M MnSO<sub>4</sub> electrolytes; Contribution of the capacitive-controlled process to the capacity of MnO-C/PDA in (c) 2 M ZnSO<sub>4</sub> and (f) 2 M ZnSO<sub>4</sub> + 0.5 M MnSO<sub>4</sub> electrolytes.

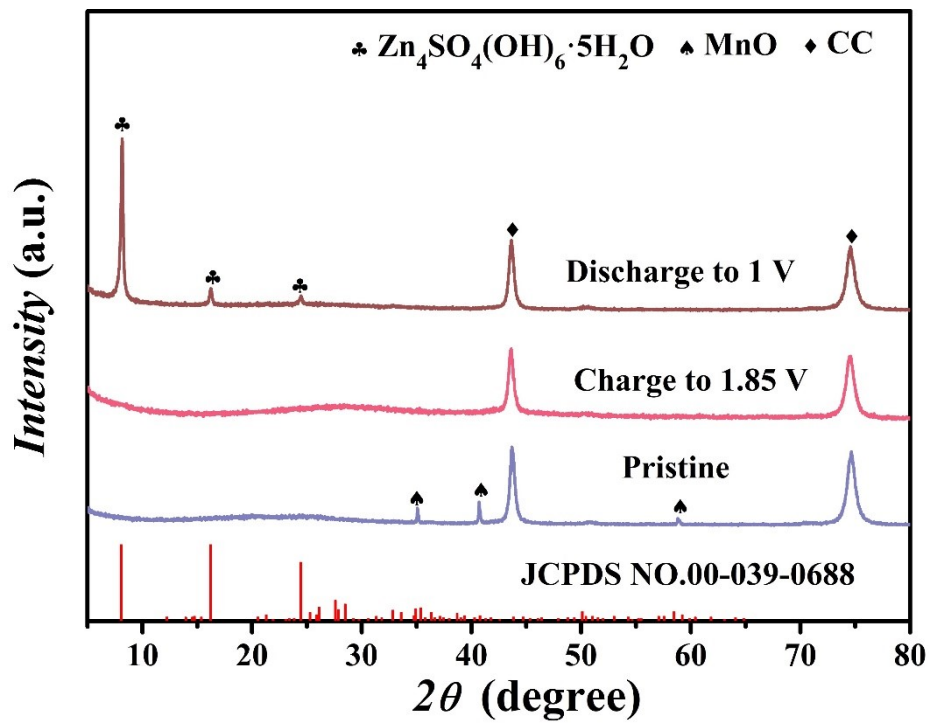

**Fig. S7.** Ex-situ XRD patterns of MnO-C/PDA in 2 M  $\text{ZnSO}_4$  electrolyte at the initial, charging and discharging states.

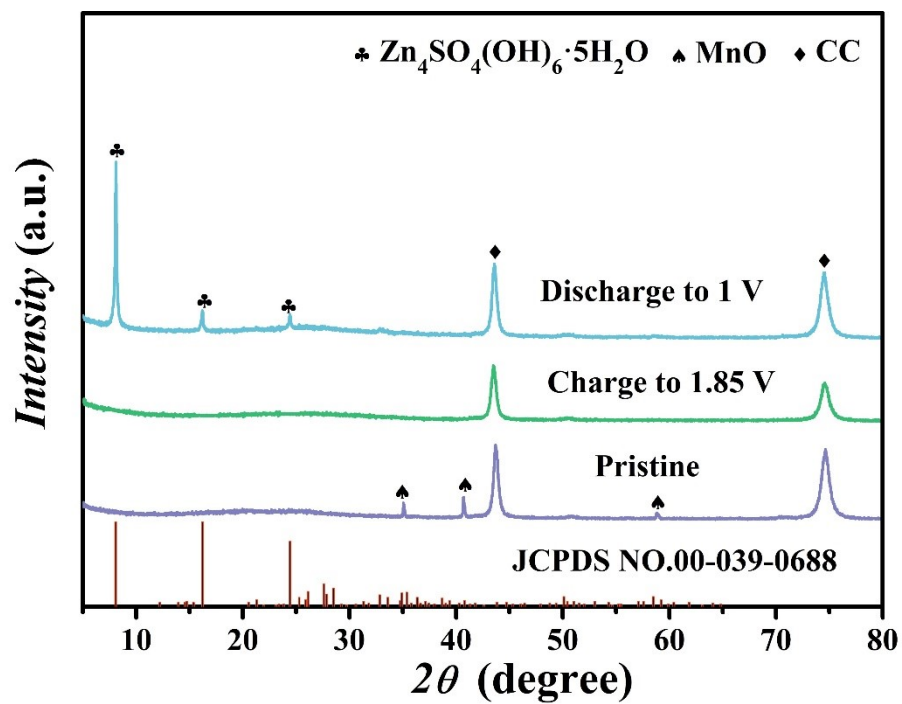

**Fig. S8.** Ex-situ XRD patterns of MnO-C/PDA in 2 M  $ZnSO_4$  + 0.5 M  $MnSO_4$  electrolyte at the initial, charging and discharging states.

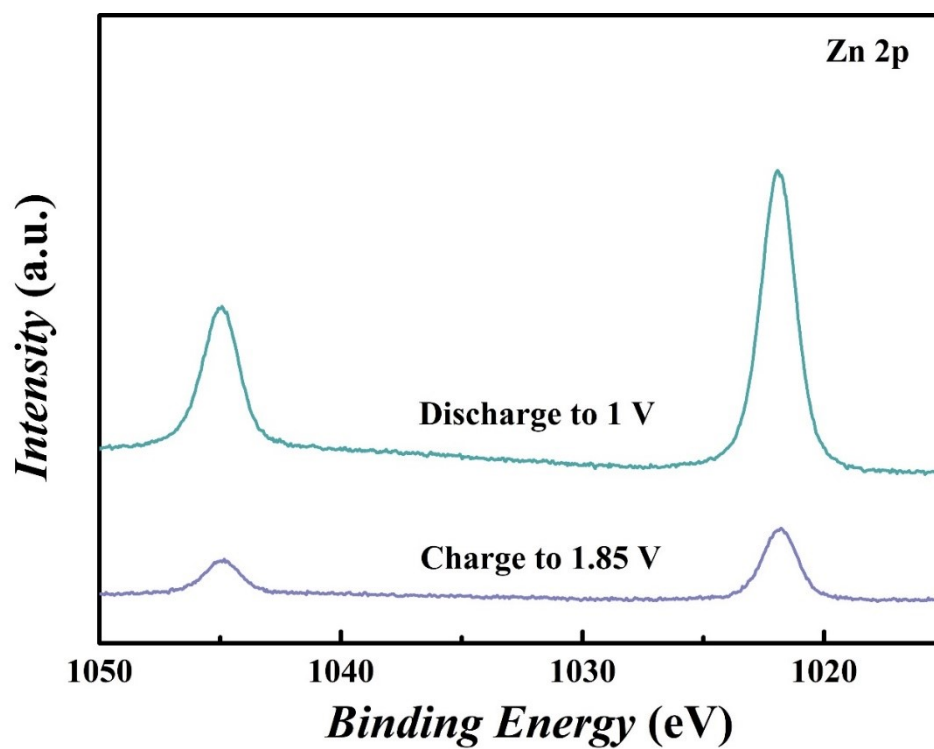

**Fig. S9.** XPS spectra of Zn 2p region at the charging and discharging states.

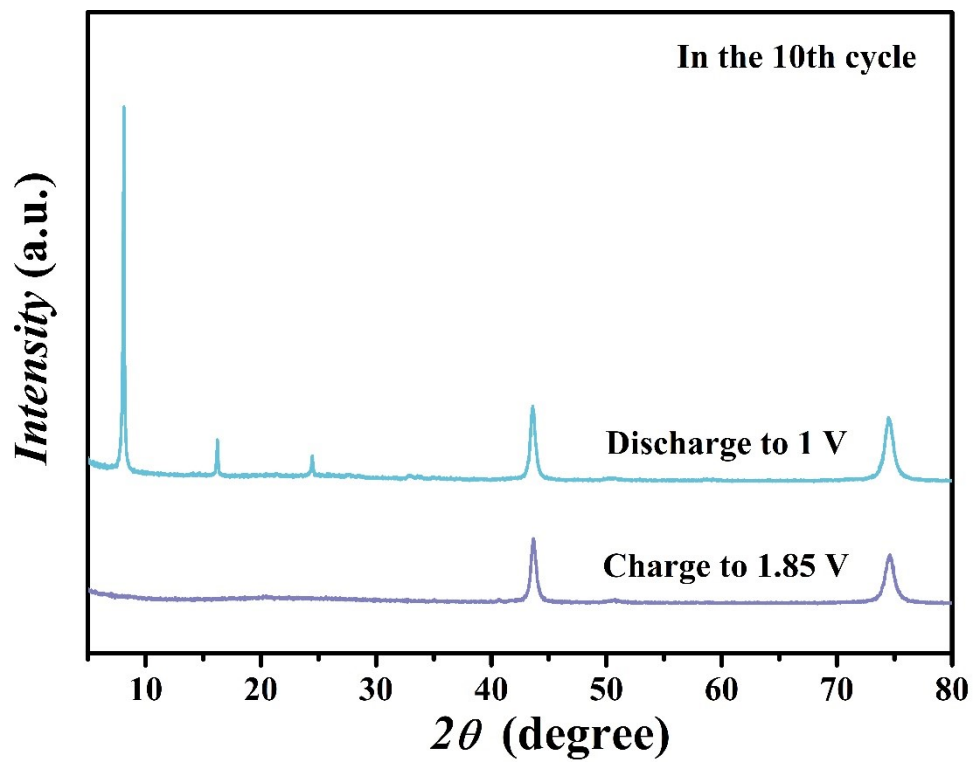

**Fig. S10.** Ex-situ XRD patterns of MnO-C/PDA in 2 M ZnSO<sub>4</sub> + 0.2 M MnSO<sub>4</sub> electrolyte for the charging and discharging states at the 10th cycle.

**Table S1.** Performance comparison of aqueous ZIBs with manganese oxide-based materials as cathodes.

| Cathode material                                | Electrolyte                                      | Specific capacity                                      | Capacity retention                                       | Ref.         |
|-------------------------------------------------|--------------------------------------------------|--------------------------------------------------------|----------------------------------------------------------|--------------|
| MnO-C/PDA                                       | 2 M ZnSO <sub>4</sub> + 0.2 M MnSO <sub>4</sub>  | 295.4 mA h g <sup>-1</sup> at<br>0.2 A g <sup>-1</sup> | 88.9% after 500 cycles<br>at 1 A g <sup>-1</sup>         | This<br>work |
| F-MO                                            | 2 M ZnSO <sub>4</sub> + 0.2 M MnSO <sub>4</sub>  | 288 mA h g <sup>-1</sup> at<br>0.1 A g <sup>-1</sup>   | 96% after 200 cycles at<br>0.2 A g <sup>-1</sup>         | <sup>1</sup> |
| MnO <sub>2</sub> @MXene                         | 2 M ZnSO <sub>4</sub> + 0.2 M MnSO <sub>4</sub>  | 184 mA h g <sup>-1</sup> at<br>0.05 A g <sup>-1</sup>  | 84.5% after 1000 cycles<br>at 0.1 A g <sup>-1</sup>      | <sup>2</sup> |
| HCM                                             | 2 M ZnSO <sub>4</sub> + 0.3 M MnSO <sub>4</sub>  | 341 mA h g <sup>-1</sup> at<br>0.2 A g <sup>-1</sup>   | 87% after 3500 cycles at<br>2 A g <sup>-1</sup>          | <sup>3</sup> |
| ε- MnO <sub>2</sub> @N                          | 2 M ZnSO <sub>4</sub> + 0.5 M MnSO <sub>4</sub>  | 183.4 mA h g <sup>-1</sup> at<br>0.5 A g <sup>-1</sup> | 83% after 1000 cycles at<br>5 A g <sup>-1</sup>          | <sup>4</sup> |
| δ- MnO <sub>2</sub>                             | 1 M ZnSO <sub>4</sub>                            | 252 mA h g <sup>-1</sup> at<br>0.083 A g <sup>-1</sup> | 43% after 100 cycles at<br>0.083 A g <sup>-1</sup>       | <sup>5</sup> |
| Mn <sub>3</sub> O <sub>4</sub> /CP              | 2 M ZnSO <sub>4</sub> + 0.2 M MnSO <sub>4</sub>  | 201 mA h g <sup>-1</sup> at<br>0.3 A g <sup>-1</sup>   | No decreasing after 200<br>cycles at 1 A g <sup>-1</sup> | <sup>6</sup> |
| ZnMn <sub>2</sub> O <sub>4</sub> /NG            | 1 M ZnSO <sub>4</sub> + 0.05 M MnSO <sub>4</sub> | 232 mA h g <sup>-1</sup> at<br>0.1 A g <sup>-1</sup>   | 97.4% after 2500 cycles<br>at 1 A g <sup>-1</sup>        | <sup>7</sup> |
| O <sub>cu</sub> -Mn <sub>2</sub> O <sub>3</sub> | 3 M ZnSO <sub>4</sub> + 0.1 M MnSO <sub>4</sub>  | 241 mA h g <sup>-1</sup> at<br>0.1 A g <sup>-1</sup>   | 88% after 600 cycles at<br>1 A g <sup>-1</sup>           | <sup>8</sup> |
| ZMO/CNTs                                        | 1 M ZnSO <sub>4</sub> + 0.1 M MnSO <sub>4</sub>  | 220.3 mA h g <sup>-1</sup> at<br>0.1 A g <sup>-1</sup> | 97.0% after 2000 cycles<br>at 3 A g <sup>-1</sup>        | <sup>9</sup> |

|                                      |                                                                                                                    |                                                        |                                                             |    |
|--------------------------------------|--------------------------------------------------------------------------------------------------------------------|--------------------------------------------------------|-------------------------------------------------------------|----|
| Mn <sub>3</sub> O <sub>4</sub> @HCFs | 2 M ZnSO <sub>4</sub> + 0.15 M MnSO <sub>4</sub>                                                                   | 215.8 mA h g <sup>-1</sup> at<br>0.3 A g <sup>-1</sup> | No decreasing after<br>1300 cycles at 0.4 A g <sup>-1</sup> | 10 |
| Fe/ $\alpha$ -MnO <sub>2</sub> @PPy  | 2 M ZnSO <sub>4</sub> + 0.1 M MnSO <sub>4</sub>                                                                    | 270 mA h g <sup>-1</sup> at<br>0.1 A g <sup>-1</sup>   | 71.4.% after 100 cycles<br>at 0.1 A g <sup>-1</sup>         | 11 |
| $\alpha$ -MnO <sub>2</sub> /CNT      | 2 M ZnSO <sub>4</sub> + 0.1 M MnSO <sub>4</sub>                                                                    | 296 mA h g <sup>-1</sup> at<br>0.2 A g <sup>-1</sup>   | No decreasing after 100<br>cycles at 0.2 A g <sup>-1</sup>  | 12 |
| HMs                                  |                                                                                                                    |                                                        |                                                             |    |
| Ti-MnO <sub>2</sub>                  | 3 M Zn(CF <sub>3</sub> SO <sub>3</sub> ) <sub>2</sub> + 0.1 M<br>Mn(CF <sub>3</sub> SO <sub>3</sub> ) <sub>2</sub> | 259 mA h g <sup>-1</sup> at<br>0.1 A g <sup>-1</sup>   | 80% after 4000 cycles at<br>1 A g <sup>-1</sup>             | 13 |

---

## References

1. D. Wang, Z. Liu, X.-W. Gao, Q. Gu, L. Zhao and W.-B. Luo, Massive anionic fluorine substitution two-dimensional  $\delta$ -MnO<sub>2</sub> nanosheets for high-performance aqueous zinc-ion battery, *J. Energy Storage*, 2023, **72**, 108740.
2. L. Wu, Y. Mei, Y. Liu, W. Xu, M. Zhang, Y. Dong and Z.-S. Wu, Interfacial synthesis of strongly-coupled  $\delta$ -MnO<sub>2</sub>/MXene heteronanosheets for stable zinc ion batteries with Zn<sup>2+</sup>-exclusive storage mechanism, *Chem. Eng. J.*, 2023, **459**, 141662.
3. S. Luo, J. Xu, B. Yuan, L. Chen, L. Xu, R. Zheng, Y. Wang, M. Zhang, Y. Lu and Y. Luo, Biomass-derived nitrogen-doped carbon fiber driven  $\delta$ -MnO<sub>2</sub> for aqueous zinc-ion batteries with high energy and power density, *Carbon*, 2023, **214**, 118334.
4. Y. Zhang, Y. Liu, Z. Liu, X. Wu, Y. Wen, H. Chen, X. Ni, G. Liu, J. Huang and S. Peng, MnO<sub>2</sub> cathode materials with the improved stability via nitrogen doping for aqueous zinc-ion batteries, *J. Energy Chem.*, 2022, **64**, 23-32.
5. M. H. Alfaruqi, J. Gim, S. Kim, J. Song, D. T. Pham, J. Jo, Z. Xiu, V. Mathew and J. Kim, A layered  $\delta$ -MnO<sub>2</sub> nanoflake cathode with high zinc-storage capacities for eco-friendly battery applications, *Electrochem. Commun.*, 2015, **60**, 121-125.
6. A. Dhiman and D. G. Ivey, Electrodeposited manganese oxide on carbon paper for zinc-ion battery cathodes, *Batteries & Supercaps*, 2020, **3**, 293-305.
7. L. Chen, Z. Yang, H. Qin, X. Zeng and J. Meng, Advanced electrochemical



- performance of ZnMn<sub>2</sub>O<sub>4</sub>/N-doped graphene hybrid as cathode material for zinc ion battery, *J. Power Sources*, 2019, **425**, 162-169.
8. N. Liu, X. Wu, Y. Yin, A. Chen, C. Zhao, Z. Guo, L. Fan and N. Zhang, Constructing the efficient ion diffusion pathway by introducing oxygen defects in Mn<sub>2</sub>O<sub>3</sub> for high-performance aqueous zinc-ion batteries, *ACS Appl. Mater. Interfaces*, 2020, **12**, 28199-28205.
  9. F. Gao, B. Mei, X. Xu, J. Ren, D. Zhao, Z. Zhang, Z. Wang, Y. Wu, X. Liu and Y. Zhang, Rational design of ZnMn<sub>2</sub>O<sub>4</sub> nanoparticles on carbon nanotubes for high-rate and durable aqueous zinc-ion batteries, *Chem. Eng. J.*, 2022, **448**, 137742.
  10. J. Long, Z. Yang, F. Yang, J. Cuan and J. Wu, Electrospun core-shell Mn<sub>3</sub>O<sub>4</sub>/carbon fibers as high-performance cathode materials for aqueous zinc-ion batteries, *Electrochim. Acta*, 2020, **344**, 136155.
  11. J.-W. Xu, Q.-L. Gao, Y.-M. Xia, X.-S. Lin, W.-L. Liu, M.-M. Ren, F.-G. Kong, S.-J. Wang and C. Lin, High-performance reversible aqueous zinc-ion battery based on iron-doped alpha-manganese dioxide coated by polypyrrole, *J. Colloid Interface Sci.*, 2021, **598**, 419-429.
  12. Y. Liu, X. Chi, Q. Han, Y. Du, J. Huang, Y. Liu and J. Yang,  $\alpha$ -MnO<sub>2</sub> nanofibers/carbon nanotubes hierarchically assembled microspheres: Approaching practical applications of high-performance aqueous Zn-ion batteries, *J. Power Sources*, 2019, **443**, 227244.
  13. S. Lian, C. Sun, W. Xu, W. Huo, Y. Luo, K. Zhao, G. Yao, W. Xu, Y. Zhang and

Z. Li, Built-in oriented electric field facilitating durable ZnMnO<sub>2</sub> battery, *Nano Energy*, 2019, **62**, 79-84.
